# Supplementary material
Source: Springer Nature journal article supplement (https://www.springermedizin.de/resource/supplementary/12931_2013_1462_MOESM13_ESM.pdf/9426230)

A.

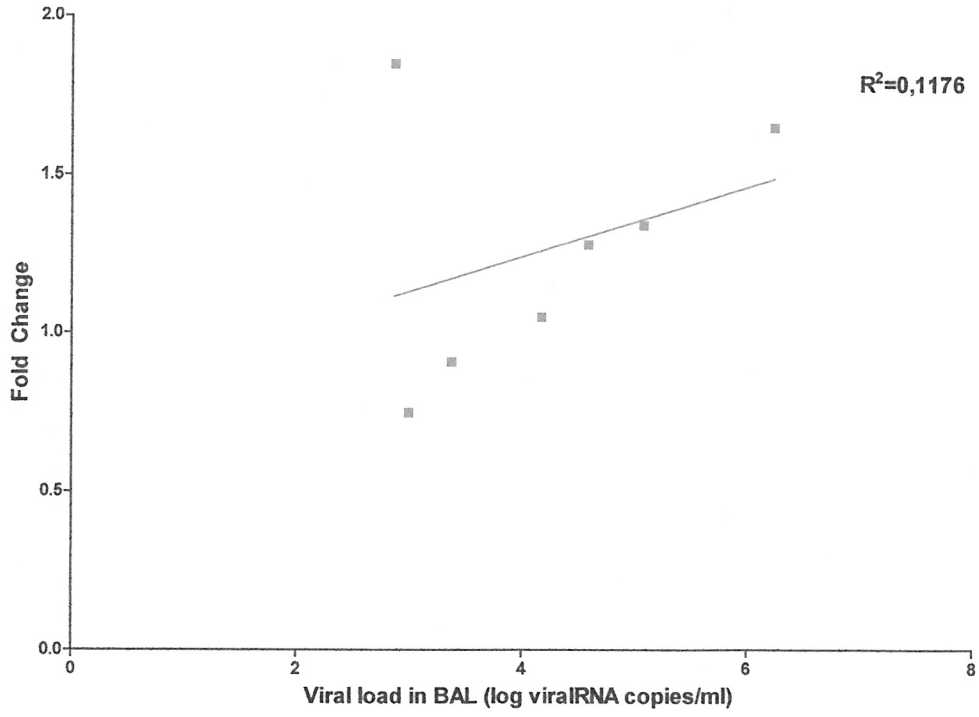

B.

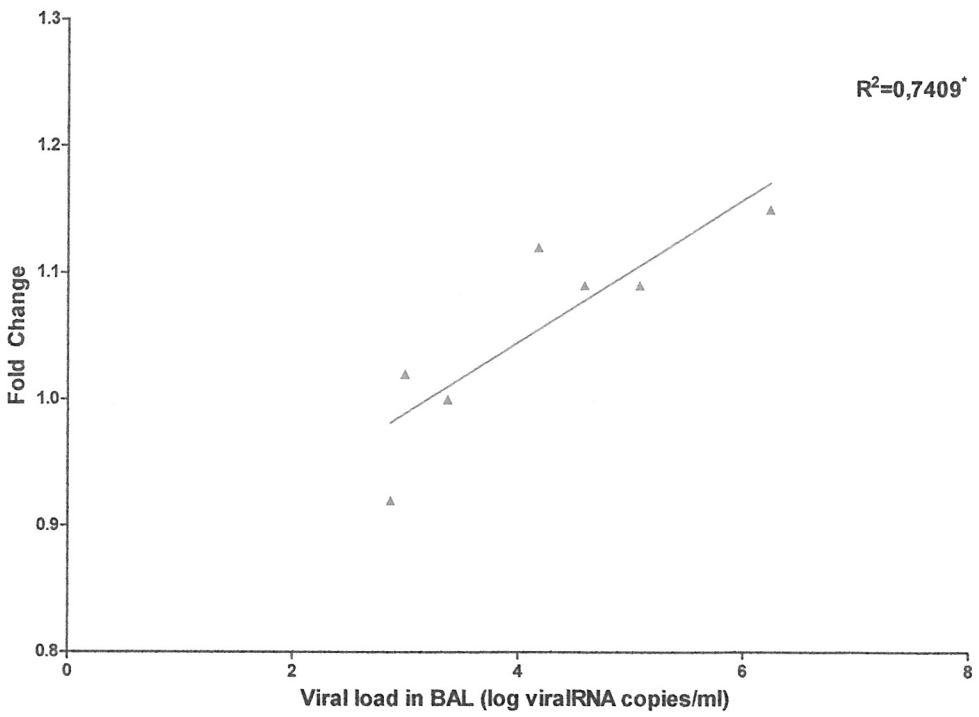

C.

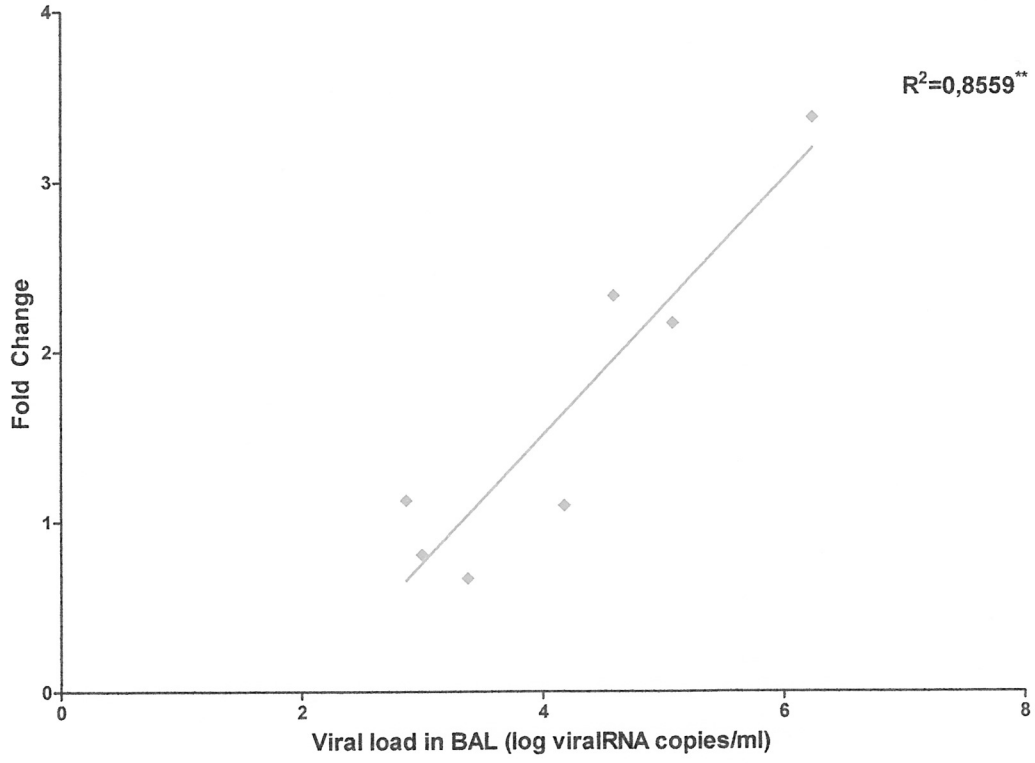

D.

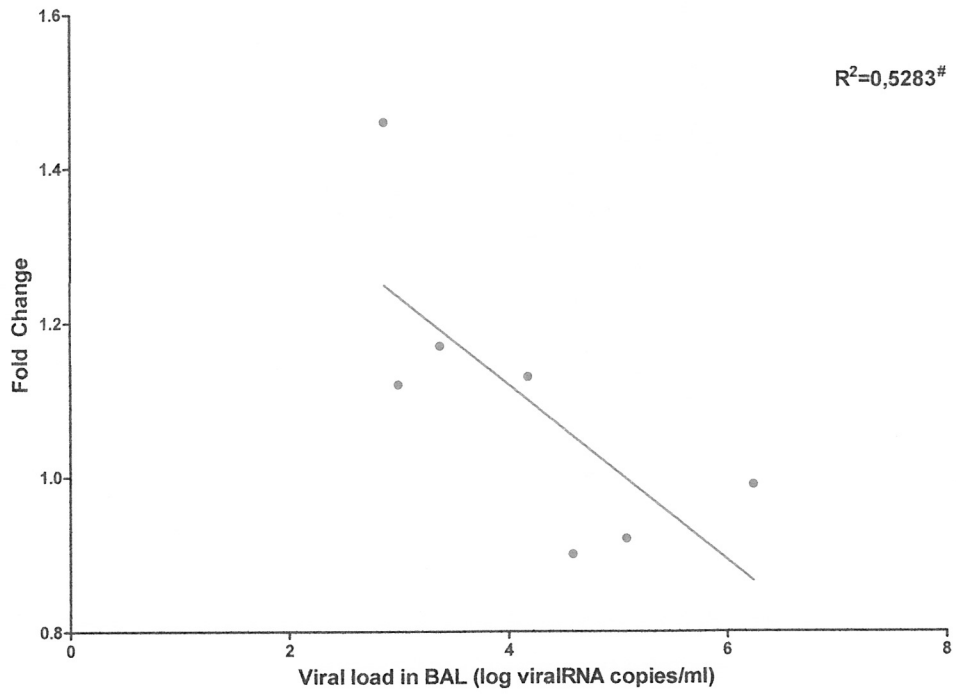

# p=0.06

Supplement: MOESM13 [file 9426230]
